# Supplementary material
Source: PubMed Central journal article supplement (PMC2664070)
Supplement: 0900238106_0900238106SI.pdf [file 0900238106_0900238106SI.pdf]

# Supporting Information

Qin et al. 10.1073/pnas.0900238106

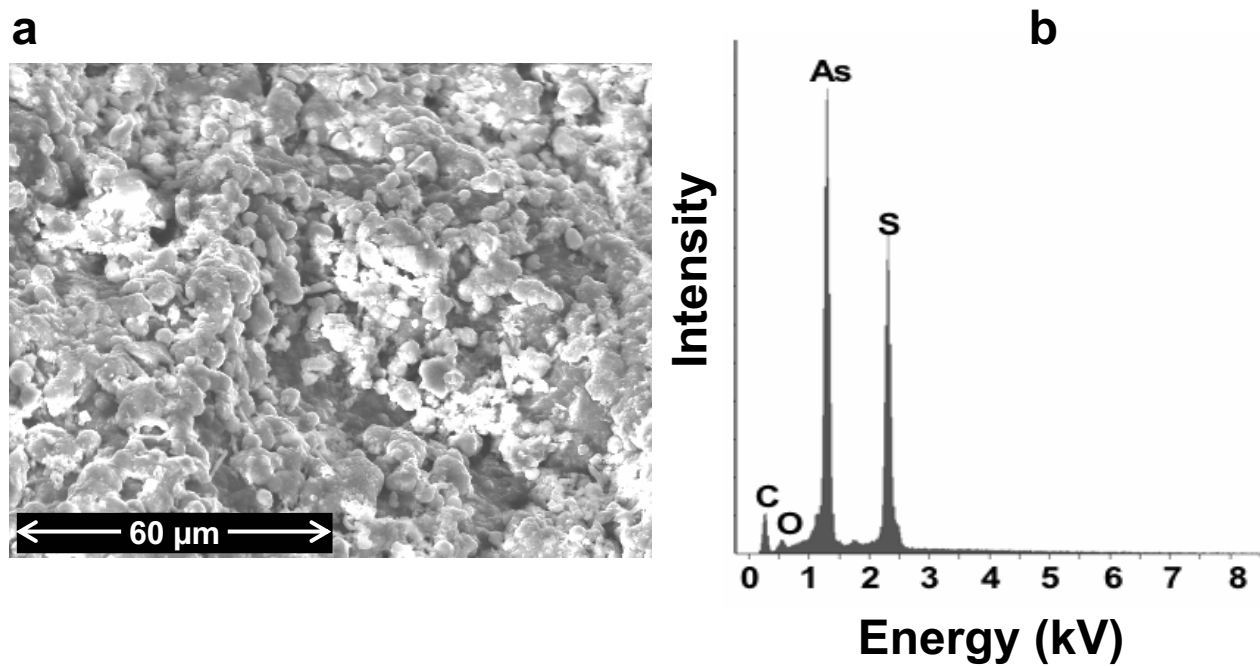

**Fig. S1.** Analytical examination of the orange-yellow solid phase associated with the Cyanidiales mat in Fig. 1C. (a) Scanning electron micrograph. (b) Energy-dispersive X-ray analysis. The solid-phase surface layers consist primarily of As and S at an As/S ratio of 1.1:1.3.

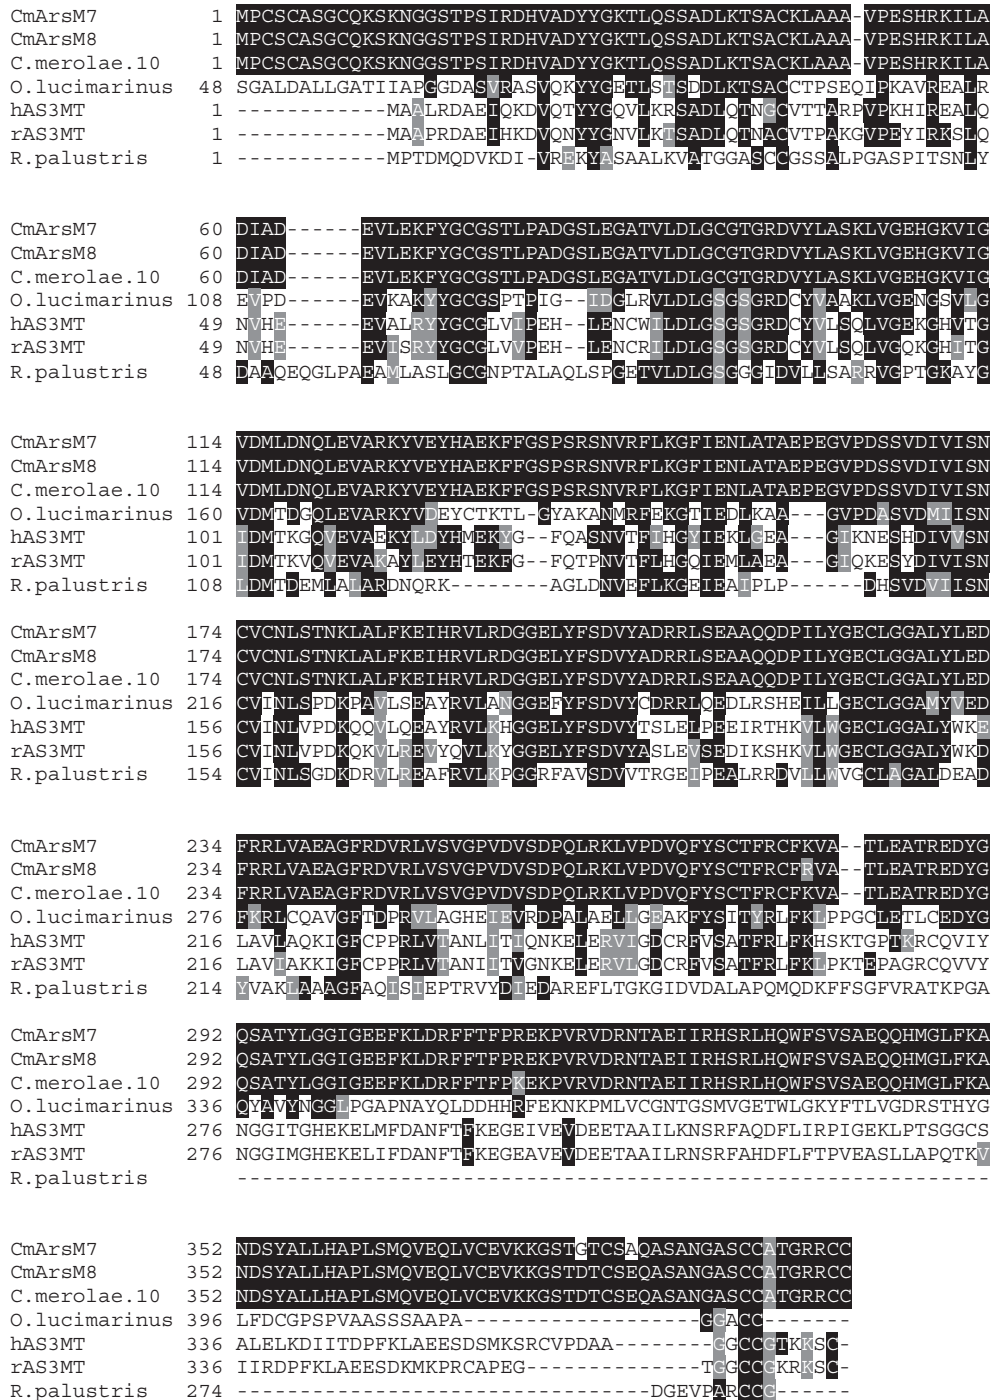

**Fig. S2.** Multiple alignment of ArsM homologues. *Cyanidioschyzon* strain 5508 As(III)-S-adenosylmethionine methyltransferases *CmArsM7* (FJ476310) and *CmArsM8* (FJ463403) were aligned with homologues from *C. merolae* strain 10D (AY286122), *O. lucimarinus* (ABP00263.1), human (AAI19639), rat (EDL94361) and *R. palustris* (NP\_948900) (GenBank accession nos. in parentheses). The shading illustrates conservation of residues in the 3 *Cyanidioschyzon* sequences (identities in black; conserved residues in gray).

**Table S1. Biomethylation of arsenite in *E. coli* expressing algal *CmarsM7***

| Time, h | As(III), $\mu\text{M}$ | DMAs(V), $\mu\text{M}$ | TMAO, $\mu\text{M}$ | TMAAs(III), % total arsenic |
|---------|------------------------|------------------------|---------------------|-----------------------------|
| 0       | 15                     | 0                      | 0                   | 0                           |
| 3       | 7.9                    | 1.1                    | 0                   | 0                           |
| 5       | 1.2                    | 7.4                    | 0.023               | 5.3                         |

The ICP-MS data from Fig. 4 were quantified by using instrumental software. The data represent the average of 2 experiments.

**Table S2. Purified CmArsM7 and CmArsM8 are arsenite S-adenosylmethionine methyltransferases**

| Buffer/enzyme  | Initial As(III), $\mu\text{M}$ | As(III), $\mu\text{M}$ | DMAs(V), $\mu\text{M}$ | TMAO, $\mu\text{M}$ |
|----------------|--------------------------------|------------------------|------------------------|---------------------|
| Control buffer | 3.5                            | 3.3                    | 0                      | 0                   |
| CmArsM8        | 3.5                            | 0.51                   | 4.0                    | 0.10                |
| CmArsM7        | 3.5                            | 1.2                    | 2.0                    | 0.047               |

The ICP-MS data from Fig. 5A were quantified by using instrumental software. The data represent the average of 2 experiments.
